# Supplementary material
Source: publisher figshare collection journal article supplement (https://gsajournals.figshare.com/ndownloader/files/22063035)
Supplement: Supplementary file 1 [file 22063035]

## Sheet: Sheet2
Supplemental Table 4. MuDR small RNAs.
MuDR
size	Sense a	Antisense	Ratio	total
18	17	12	1.42	29
19	10	9	1.11	19
20	14	19	0.74	33
21	125	104	1.2	229
22	359	462	0.78	821
23	18	8	2.25	26
24	57	23	2.48	80
mudrA
	Sense	Antisense	Ratio
18	14	10	1.4	24
19	10	9	1.11	19
20	11	17	0.65	28
21	119	97	1.23	216
22	349	453	0.77	802
23	16	7	2.29	23
24	44	9	4.89	53
shared by MuDR and Muk
	Sense	Antisense	Ratio	total
18	12	10	1.2	22
19	6	8	0.75	14
20	10	15	0.67	25
21	83	67	1.24	150
22	320	404	0.79	724
23	17	6	2.83	23
24	55	10	5.5	65
specific to MuDR
	Sense	Antisense	Ratio	total
18	5	0	na	5
19	4	1	4	5
20	3	2	1.5	5
21	41	31	1.32	72
22	36	50	0.72	86
23	1	1	1	2
24	0	1	0	1
TIRA
	Sense	Antisense	Ratio	total
18	3	1	3	4
19	0	0	ba	0
20	2	3	0.67	5
21	7	13	0.54	20
22	12	68	0.18	80
23	2	1	2	3
24	11	5	2.2	16
5'TIRA
	Sense	Antisense	ratio	total
18	3	0	na	3
19	0	0	na	0
20	2	0	na	2
21	6	1	6	7
22	8	1	8	9
23	2	0	na	2
24	11	2	5.5	13
3'TIRA
	Sense	Antisense	ratio	total
18	0	1	0	1
19	0	0	na	0
20	0	3	0	3
21	1	12	0.08	13
22	4	67	0.06	71
23	0	1	0	1
24	0	3	0	3
Summary for 22 and 21 nt small RNAs
	22	21	ratio
MuDR	821	229	3.58515
mudrA	802	216	3.71296
shared	724	150	4.82667
MuDR sp.	86	72	1.19444
TIRA	80	20	4
5'TIRA	9	7	1.28571
3'TIRA	71	13	5.46154
a sense and antisense reads per million reads
